# Supplementary material for: Cellular events and behaviors after grafting of stratified squamous epithelial cell sheet onto a hydrated collagen gel
Source: PubMed Central journal article supplement (PMC5407900; doi:10.1002/2211-5463.12213), 2017-03-28
Supplement: FEB4-7-691-s001.pdf [file FEB4-7-691-s001.pdf]

Y Kasai, et al.  
Submitted to *FEBS Open Bio*

# **Supplemental informations**

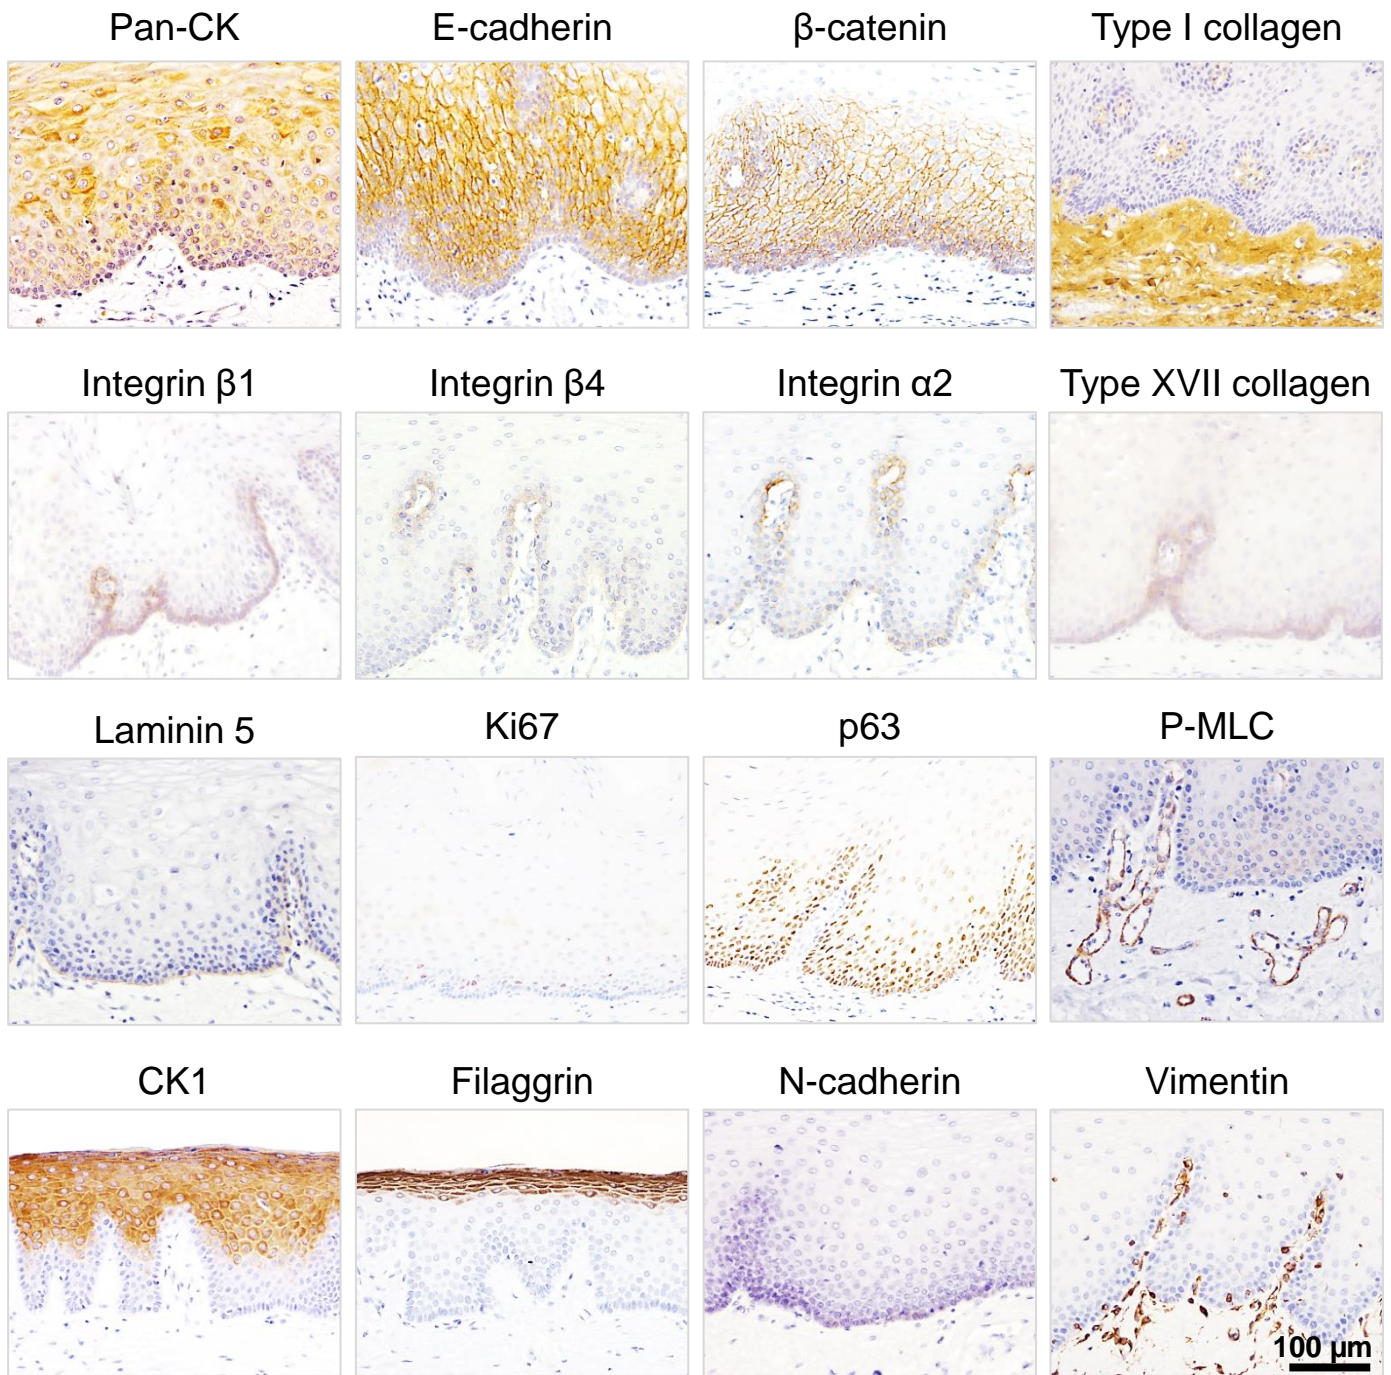

Fig. S1. Validation of antibodies using an immunohistochemical analysis of native human epithelial tissue. The top of each panel is labeled with the protein of interest (see also Table S1).

After detachment

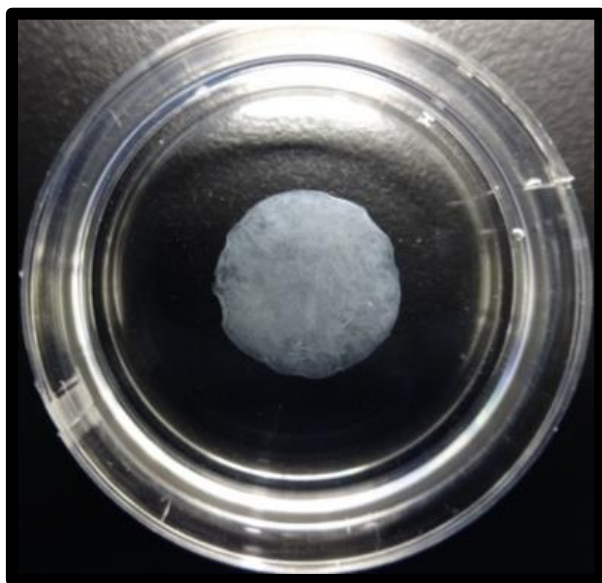

1 day after detachment

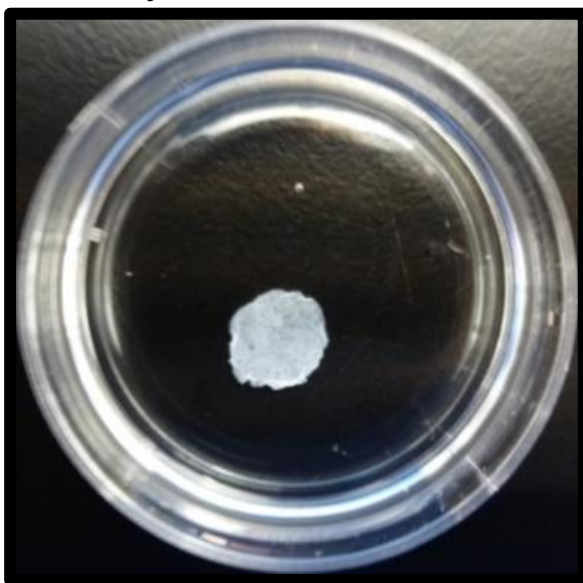

Fig. S2. Shrinking behavior of the NHEK cell sheet after detachment. Immediately after detachment from the temperature-responsive cell culture insert (left) and 1 day after detachment without grafting (right).

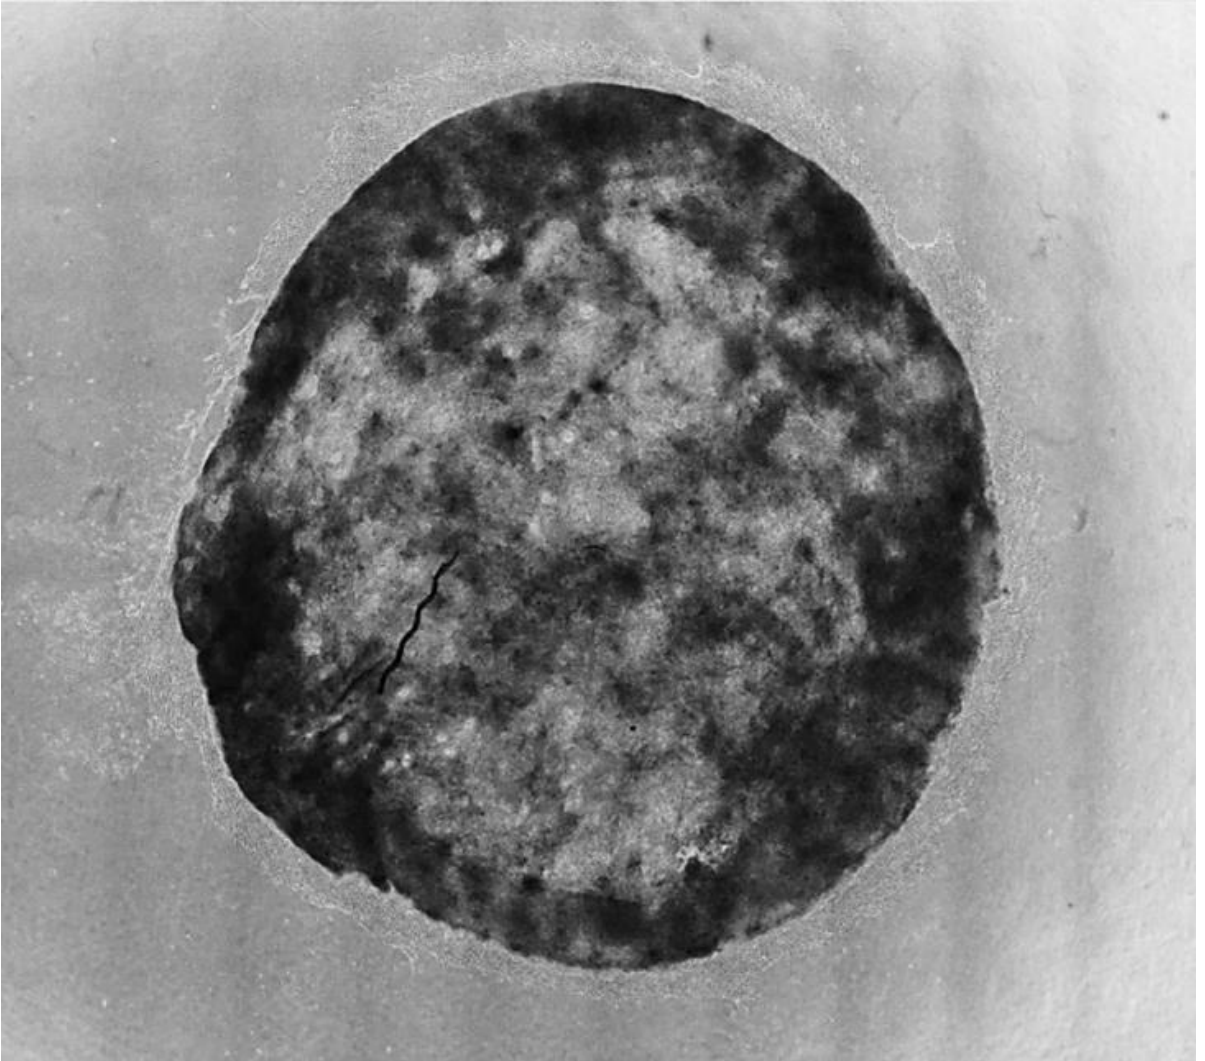

Fig. S3. Migrating cells observed in the entire perimeter of the cell sheet 7 days post-grafting.

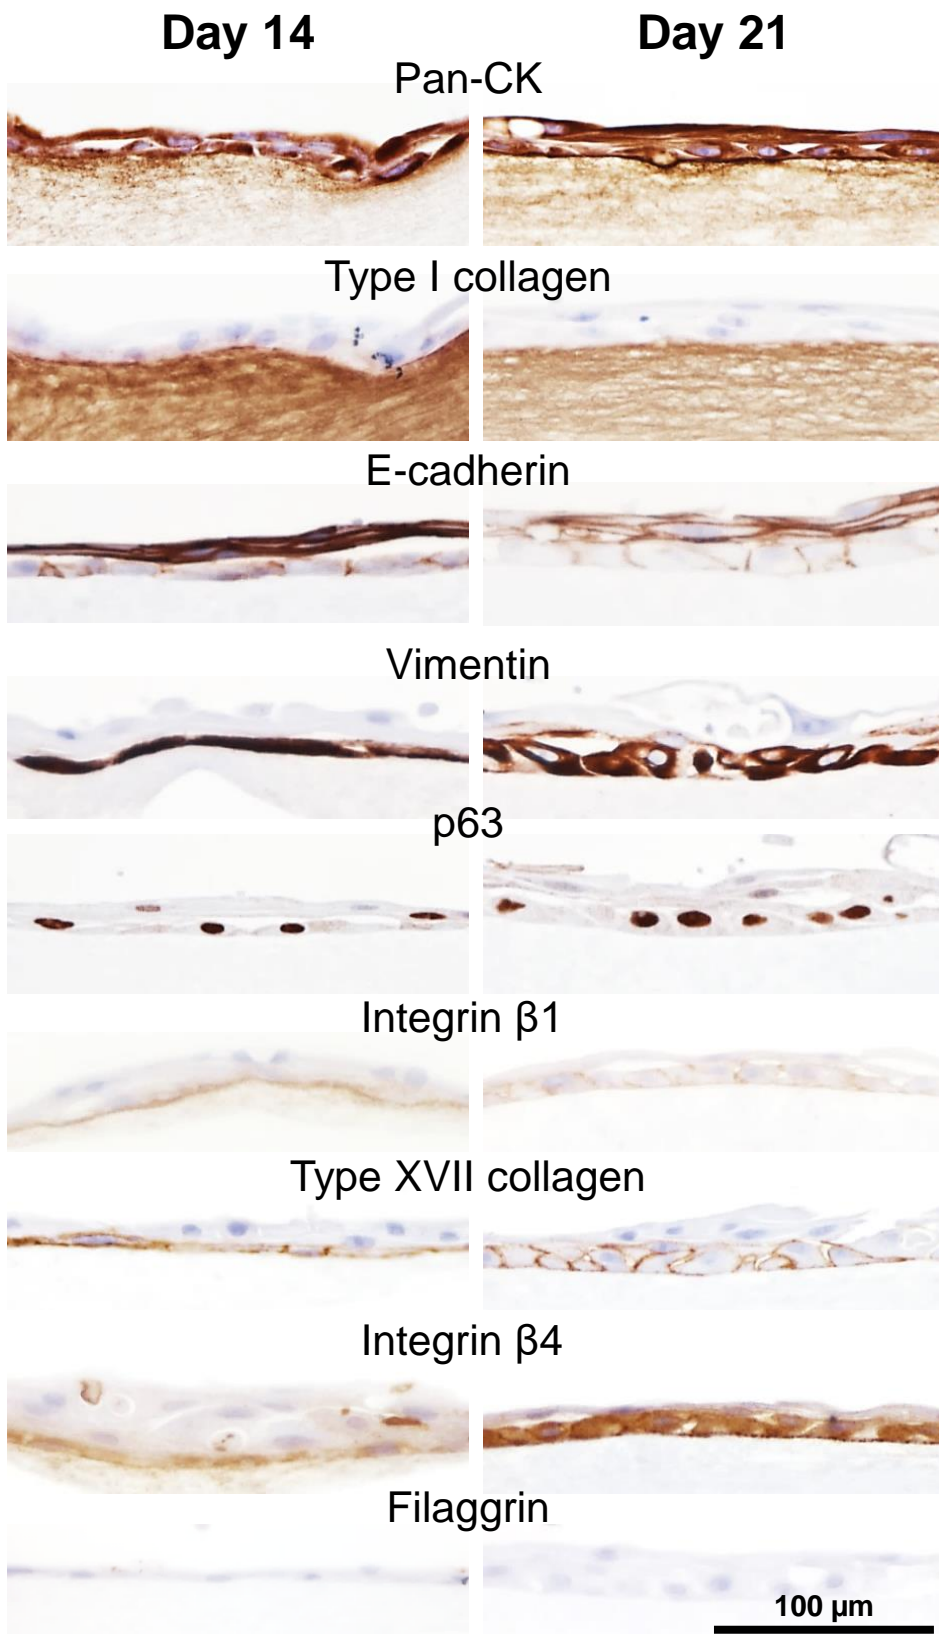

Fig. S4. Immunohistochemical analyses of the NHEK cell sheets at 14 days (left column) and 21 days (right column) post-grafting. The top of each panel is labeled with the protein of interest.

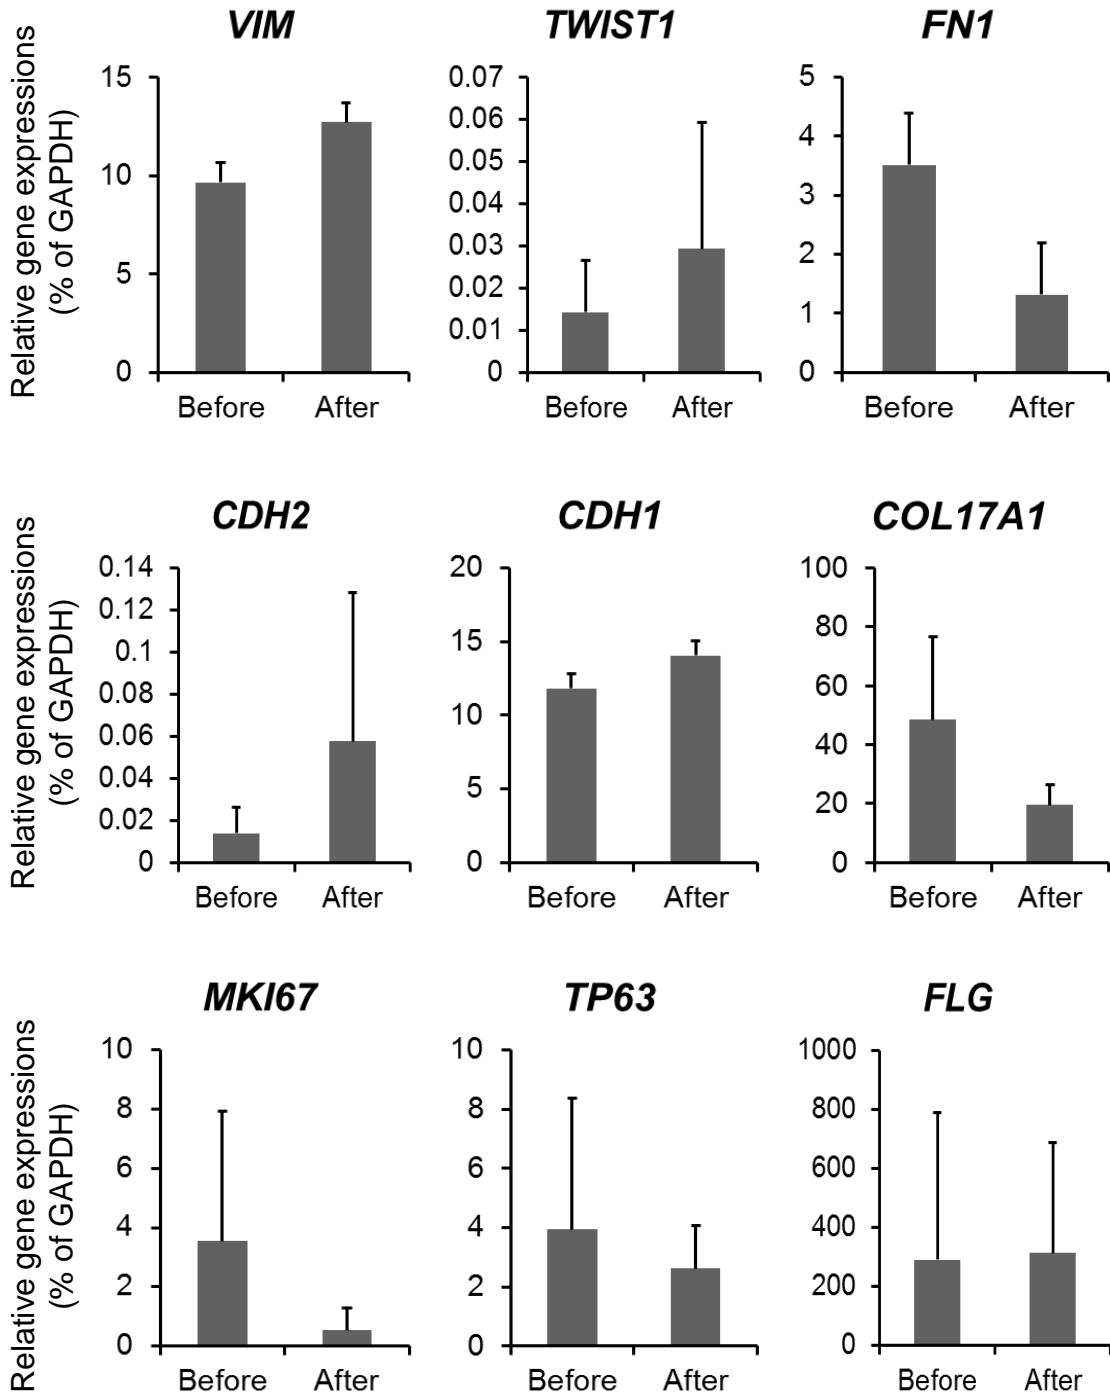

Fig. S5. Quantitative RT-PCR analysis of mRNA expression in the cell sheets pre- and post-grafting. The top of each panel is labeled with the mRNA of interest. The expression level of each mRNA was normalized using the levels GAPDH mRNA. Mean  $\pm$  S.D. (n=3). Analysis of the gene expression data revealed no statistical difference in mRNA levels between pre- and post-grafting ( $p > 0.05$ ).

Table S1. Antibodies used for immunohistochemistry.

| Name                                         | Clone            | IHC dilution | Cat No./Vendor           | Function                                                                                                            | Reference  |
|----------------------------------------------|------------------|--------------|--------------------------|---------------------------------------------------------------------------------------------------------------------|------------|
| Pan-cytokeratin                              | AE1/AE3          | 1/100        | ab27988, Abcam           | Epithelial intermediate filament (Epithelial marker)                                                                | 15         |
| E-cadherin                                   | NCH-38           | 1/100        | M3612, Dako              | Epithelial cell-cell adhesion marker                                                                                | 16         |
| $\beta$ -catenin                             | $\beta$ -catenin | 1/100        | M3539, Dako              | Epithelial cell-cell adhesion and transcription factor of Wnt/ $\beta$ -catenin pathway for EMT (Epithelial marker) | 16, 46, 47 |
| N-cadherin                                   | D4R1H            | 1/100        | 13116, Cell signaling    | Epithelial cell-cell adhesion protein (Mesenchymal marker)                                                          | 17         |
| Vimentin                                     | V9               | 1/50         | M0725, Dako              | Fibroblast intermediate filament (Mesenchymal marker)                                                               | 17, 32, 33 |
| Type I collagen                              | -                | 1/400        | ab34710, Abcam           | Submucosal tissue (Wound bed marker in this study)                                                                  | 18         |
| Integrin $\beta$ 1                           | -                | 1/100-200    | 4706, Cell signaling     | Matrix protein receptor (Basal cell layer marker)                                                                   | 19         |
| Integrin $\beta$ 4                           | -                | 1/200        | 4707, Cell signaling     | Matrix protein (Laminin) receptor (Basal cell layer marker)                                                         | 19, 20, 29 |
| Integrin $\alpha$ 2                          | EPR5788          | 1/400        | ab133557, Abcam          | Matrix protein receptor (Basal layer cell marker)                                                                   | 19         |
| Integrin $\alpha$ 5                          | -                | 1/400-500    | 4705, Cell signaling     | Matrix protein receptor (Basal layer cell marker)                                                                   | 19         |
| Type XVII collagen                           | NC16A-3          | 1/30         | ab79878, Abcam           | Matrix protein receptor (Basal layer cell marker)                                                                   | 19, 20     |
| Laminin 5                                    | -                | 1/100        | ab14509, Abcam           | Hemidesmosome structure and adhesion protein (Basal layer cell marker)                                              | 19, 20, 30 |
| Cytokeratin 1                                | 34 $\beta$ B4    | 1/100        | NCL-CK1, Leica           | Differentiated epithelial intermediate filament (Upper cell layer marker)                                           | 21         |
| Filaggrin                                    | FLG01            | 1/100        | MA5-13440, Thermo fisher | Differentiated epithelial cell marker (Upper layer cell marker)                                                     | 21         |
| p63                                          | 4A4              | 1/50         | sc-8431, Santa cruz      | Transcription factor of epithelial stem/progenitor cells (Cell activity marker)                                     | 23         |
| Ki67                                         | MIB-1            | 1/100        | M7240, Dako              | Cell proliferation factor (Cell proliferation marker)                                                               | 22         |
| Phospho-myosin light chain 2 (Thr 18/Ser 19) | -                | 1/50         | 3674, Cell signaling     | Cell motion protein with actin (Cell dynamics marker for migration and barrier function as actomyosin)              | 24, 28, 29 |

Table S2. Quantification of immunohistochemistry results of the harvested NHEK cell sheet.

|                                                 | Upper       |             |             |              | Basal       |             |             |             |
|-------------------------------------------------|-------------|-------------|-------------|--------------|-------------|-------------|-------------|-------------|
|                                                 | HP          | P           | LP          | N            | HP          | P           | LP          | N           |
| Pan-cytokeratin                                 | <b>52.0</b> | 17.3        | 17.4        | 13.3         | 37.6        | <b>9.1</b>  | 15.6        | 37.3        |
| E-cadherin                                      | 37.8        | <b>19.0</b> | 16.8        | 26.3         | 28.8        | <b>17.1</b> | 20.8        | 33.2        |
| $\beta$ -catenin                                | 19.3        | <b>28.4</b> | 27.8        | 24.6         | 1.9         | 9.7         | <b>40.4</b> | 48.1        |
| N-cadherin                                      | 0.0         | 0.0         | 2.2         | <b>97.8</b>  | 0.0         | 0.5         | 8.8         | <b>90.7</b> |
| Vimentin                                        | 1.3         | 7.1         | 22.1        | <b>69.5</b>  | 19.6        | <b>18.7</b> | 21.2        | 40.5        |
| Type I collagen                                 | 0.0         | 0.0         | 0.0         | <b>100.0</b> | 0.0         | 0.0         | 1.8         | <b>98.2</b> |
| Integrin $\beta$ 1                              | 1.0         | 3.9         | 8.6         | <b>86.5</b>  | 18.2        | <b>19.8</b> | 14.1        | 47.9        |
| Integrin $\beta$ 4                              | 0.0         | 1.6         | 15.5        | <b>82.8</b>  | 10.3        | <b>17.9</b> | 30.5        | 41.4        |
| Integrin $\alpha$ 2                             | 0.6         | 5.1         | 16.8        | <b>77.5</b>  | <b>64.9</b> | 22.0        | 8.3         | 4.9         |
| Type XVII collagen                              | 0.2         | 2.9         | 9.2         | <b>87.7</b>  | <b>63.5</b> | 24.2        | 6.9         | 5.4         |
| Laminin 5                                       | 0.0         | 1.2         | 24.4        | <b>74.3</b>  | 40.7        | <b>17.1</b> | 28.4        | 13.8        |
| CK1                                             | 0.1         | 0.3         | 3.4         | <b>96.3</b>  | 0.0         | 0.0         | 1.6         | <b>98.4</b> |
| Filaggrin                                       | 7.2         | 11.0        | <b>23.1</b> | 58.8         | 1.3         | 2.1         | 3.7         | <b>93.0</b> |
| Ki67                                            | 0.0         | 0.0         | 0.0         | <b>100.0</b> | 19.6        | <b>13.2</b> | 19.9        | 47.2        |
| p63                                             | 25.7        | <b>13.0</b> | 20.1        | 41.2         | 29.7        | <b>19.1</b> | 19.6        | 31.6        |
| Phospho-myosin light chain 2<br>(Thr 18/Ser 19) | 1.1         | 9.6         | <b>57.1</b> | 32.2         | 1.5         | 4.2         | 10.4        | <b>83.9</b> |

HP: Percentage contribution of High Positive, P: Percentage contribution of Positive, LP: Percentage contribution of Low Positive, N: Negative. The final determination of the expression levels of the target proteins are presented in bold letters.



Table S3. Quantification of immunohistochemistry results in the basal layer of the NHEK cell sheet before and after grafting.

|                                              | Before |             |             |             | Day 1 |             |             |             |
|----------------------------------------------|--------|-------------|-------------|-------------|-------|-------------|-------------|-------------|
|                                              | HP     | P           | LP          | N           | HP    | P           | LP          | N           |
| Integrin $\beta$ 4                           | 10.3   | <b>17.9</b> | 30.5        | 41.4        | 12.9  | <b>18.7</b> | 30.9        | 37.5        |
| E-cadherin                                   | 28.7   | <b>17.2</b> | 20.8        | 33.2        | 0.2   | 1.2         | 7.9         | <b>90.7</b> |
| $\beta$ -catenin                             | 1.9    | 9.6         | <b>40.4</b> | 48.1        | 1.8   | 9.2         | <b>28.9</b> | 60.2        |
| Vimentin                                     | 19.6   | <b>18.7</b> | 21.2        | 40.5        | 37.5  | <b>24.9</b> | 22.2        | 15.3        |
| Phospho-myosin light chain 2 (Thr 18/Ser 19) | 1.5    | 4.2         | 10.4        | <b>83.9</b> | 0.5   | 8.4         | <b>35.0</b> | 56.1        |

HP: Percentage contribution of High Positive, P: Percentage contribution of Positive, LP: Percentage contribution of Low Positive, N: Negative. The final determination of the expression levels of the target proteins are presented in bold letters.
